# Supplementary material for: Pre-diagnostic biomarkers of metabolic dysregulation and cancer mortality
Source: PubMed Central journal article supplement (PMC5882320; doi:10.18632/oncotarget.24559), 2018-02-23
Supplement: oncotarget-09-16099-s001.pdf [file oncotarget-09-16099-s001.pdf]

## Pre-diagnostic biomarkers of metabolic dysregulation and cancer mortality

**Supplementary Table 1: Detailed definitions and technical information for sociodemographics, health behaviors, chronic medical conditions, and medication use**

| Characteristic           | Definition and/or Technical Information                                                                                                                                                                                                                 |
|--------------------------|---------------------------------------------------------------------------------------------------------------------------------------------------------------------------------------------------------------------------------------------------------|
| <b>Sociodemographics</b> |                                                                                                                                                                                                                                                         |
| Age                      | Age in years                                                                                                                                                                                                                                            |
| Gender                   | Male, female                                                                                                                                                                                                                                            |
| Race                     | Black, white                                                                                                                                                                                                                                            |
| Education                | Participant reported: <ul style="list-style-type: none"> <li>- Less than high school</li> <li>- High school graduate</li> <li>- Some college</li> <li>- College or higher</li> <li>- Missing</li> </ul>                                                 |
| Income                   | Participant reported: <ul style="list-style-type: none"> <li>- &lt;\$20k</li> <li>- \$20k-\$34k</li> <li>- \$35k-\$74k</li> <li>- ≥\$75k</li> <li>- Missing (not reported)</li> </ul>                                                                   |
| <b>Health Behaviors</b>  |                                                                                                                                                                                                                                                         |
| Smoking Status           | Participant reported: <ul style="list-style-type: none"> <li>- Current</li> <li>- Past</li> <li>- Never</li> </ul>                                                                                                                                      |
| Alcohol use              | Participant reported: <ul style="list-style-type: none"> <li>- None</li> <li>- Moderate (up to 1 drink per day for women or 2 drinks per day for men)</li> <li>- Heavy (&gt;1 drink per day for women and &gt;2 drinks per day for men) [1].</li> </ul> |
| Exercise activity        | Participant reported: <ul style="list-style-type: none"> <li>- None</li> <li>- 1 to 3 times per week</li> <li>- 4 or more times per week.</li> </ul>                                                                                                    |

**Supplementary Table 2: Chronic Medical Conditions**

| <b>Characteristic</b>     | <b>Definition and/or Technical Information</b>                                                                                                                                                                                  |
|---------------------------|---------------------------------------------------------------------------------------------------------------------------------------------------------------------------------------------------------------------------------|
| Atrial Fibrillation       | Participant reported history of atrial fibrillation.                                                                                                                                                                            |
| Chronic Lung Disease      | Participant use of pulmonary medications (beta agonists, leukotriene inhibitors, inhaled corticosteroids, combination inhalers, ipratropium, cromolyn, aminophylline and theophylline) as a surrogate for chronic lung disease. |
| Coronary Artery Disease   | Participant reported history of myocardial infarction, coronary artery bypass grafting, or cardiac angioplasty or stenting, or baseline electrocardiographic evidence of myocardial infarction.                                 |
| Diabetes                  | Fasting glucose $\geq 126$ mg/L (or a glucose $\geq 200$ mg/L for those not fasting) or participant reported use of insulin or oral hypoglycemic agents.                                                                        |
| Deep Vein Thrombosis      | Participant reported history of deep vein thrombosis.                                                                                                                                                                           |
| Dyslipidemia              | Low-density lipoprotein cholesterol $> 130$ mg/dL or participant reported use of lipid lowering medications.                                                                                                                    |
| Hypertension              | Systolic blood pressure $\geq 140$ mm Hg, diastolic blood pressure $\geq 90$ mm Hg, or participant reported antihypertensive agent use.                                                                                         |
| Myocardial Infarction     | Participant reported history of myocardial infarction or baseline electrocardiographic evidence of myocardial infarction.                                                                                                       |
| Obesity                   | or {body mass index $\geq 30$ kg/m <sup>2</sup> }.                                                                                                                                                                              |
| Peripheral Artery Disease | Participant reported history of lower extremity arterial bypass or leg amputation.                                                                                                                                              |
| Stroke                    | Participant reported history of stroke or transient ischemic attack.                                                                                                                                                            |
| <b>Medications</b>        |                                                                                                                                                                                                                                 |
| Aspirin use               | Participant use of aspirin.                                                                                                                                                                                                     |
| Statin use                | Participant use of statins.                                                                                                                                                                                                     |

## REFERENCE

1. National Institute on Alcohol Abuse and Alcoholism. Helping Patients Who Drink Too Much, a Clinician's

Guide [<http://pubs.niaaa.nih.gov/publications/Practitioner/CliniciansGuide2005/guide.pdf>].
